# Supplementary material for: Spatiotemporal Expression of p63 in Mouse Epidermal Commitment
Source: MDPI journal article supplement (doi:10.3390/ijms161226185), 2015-12-10
Supplement: s1 [file s1]

# Supplementary Materials: Spatiotemporal Expression of p63 in Mouse Epidermal Commitment

Qian Zhao, Shuang Liu, Huishan Zhang, Na Li, Xinyue Wang, Yujing Cao, Lina Ning, Enkui Duan and Guoliang Xia

**Table S1.** Antibodies used for whole-mount immunohistochemistry.

| Primary Antibody | Vendor and Catalog    | Dilution |
|------------------|-----------------------|----------|
| p63              | Santa Cruze, sc-8243  | 1:700    |
| K8               | Novus, NB 110-56919   | 1:1000   |
| K5               | Santa Cruze, sc-66836 | 1:500    |

**Table S2.** Primer sequences used for qRT-PCR and RT-PCR.

| Gene          | Primers                           |
|---------------|-----------------------------------|
| <i>Trp63</i>  | Forward: AGACCACGCACAGAATAAGCG    |
|               | Reverse: TGGAAAGGACACATCGAAGCTG   |
| <i>Krt8</i>   | Forward: CAAGGTGGAAGTCTAGAGTCCCCG |
|               | Reverse: CTCGTACTGGGCACGAACTTC    |
| <i>Krt5</i>   | Forward: GGAGATCGCCACCTACAGGA     |
|               | Reverse: TCCGTAGCCAGAAGAGACACT    |
| <i>Gapdh</i>  | Forward: GTCCGTTGTGGATCTGACCT     |
|               | Reverse: CGGGAGATTCTCAGTGTGGT     |
| <i>TAp63</i>  | Forward: TGCATGCGGATAACAATCC      |
|               | Reverse: GAGGAGCCGTTCTGAATCTG     |
| $\Delta Np63$ | Forward: CAAAACCCTGGAAGCAGAAA     |
|               | Reverse: GAGGAGCCGTTCTGAATCTG     |

**Table S3.** Antibodies used for immunofluorescence staining and immunohistochemistry.

| Primary Antibody | Vendor and Catalog   | Dilution |
|------------------|----------------------|----------|
| p63              | Santa Cruze, sc-8243 | 1:100    |
| $\Delta Np63$    | Santa Cruze, sc-8431 | 1:100    |
| K8               | Novus, NB 110-56919  | 1:100    |
| K14              | Millipore, CBL197    | 1:100    |

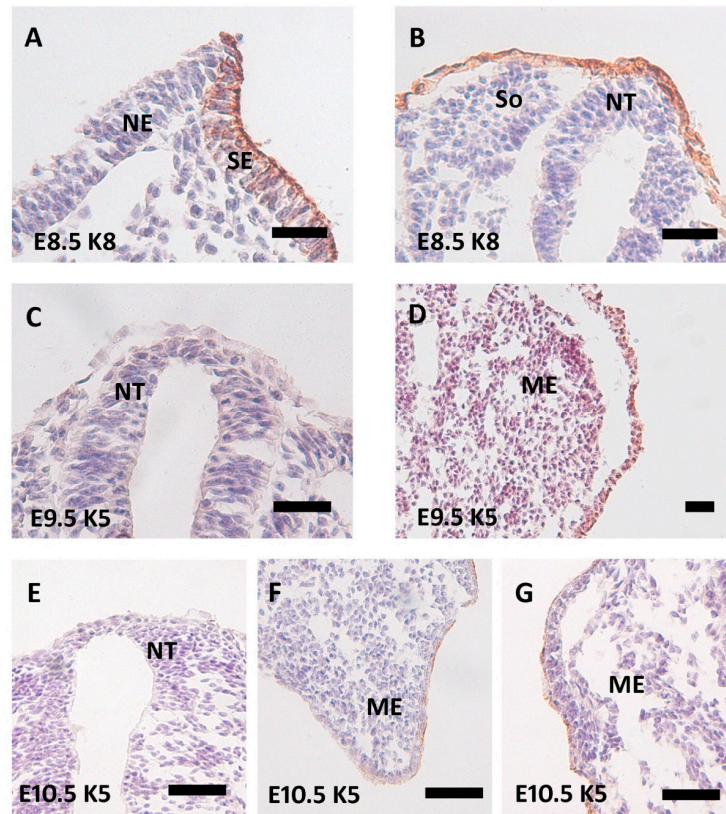

**Figure S1.** The sections of whole-mount immunohistochemistry embryos. (A,B) K8 expression in E8.5 embryos ((A) head field; (B) dorsal trunk containing a somite); (C,D) K5 expression in E9.5 embryos ((C) dorsal trunk containing the neural tube; (D) forelimb bud); (E–G) K5 expression in ((E) 10.5 embryos , neural tube; (F) forelimb bud; (G) posterior trunk containing a somite). NE, neural ectoderm; NT, neural tube; ME, mesenchyme; So, somite; SE, surface ectoderm. Bar = 50  $\mu$ m.

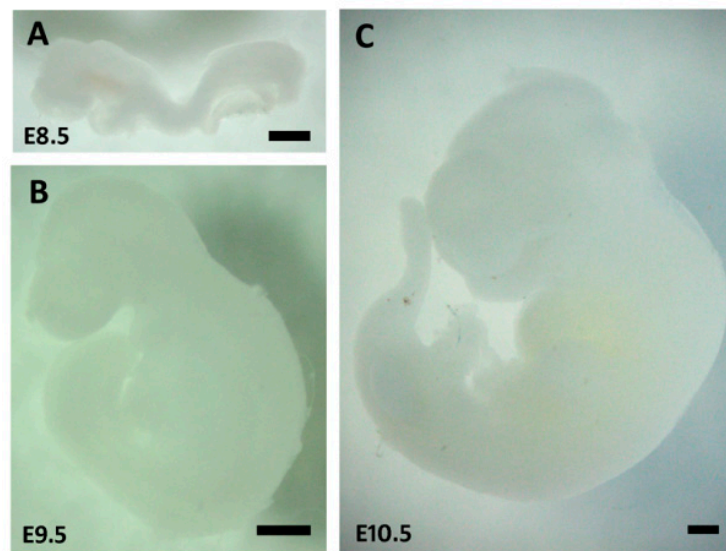

**Figure S2.** Negative controls for whole-mount immunohistochemistry embryos. (A) E8.5; (B) E9.5; (C) E10.5. Bar = 500  $\mu$ m.

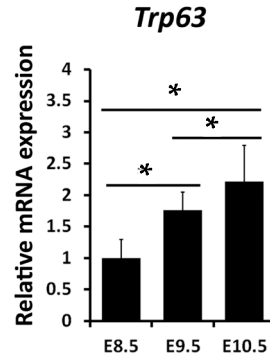

**Figure S3.** *Trp63* mRNA expression in E8.5–E10.5 embryos by qRT-PCR. \*  $p < 0.05$ .

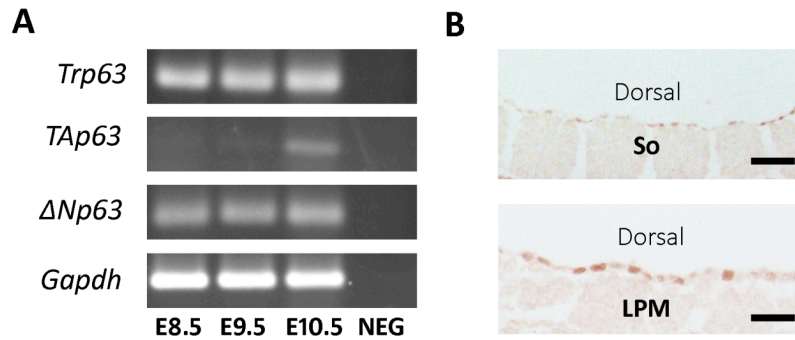

**Figure S4.** The expression of p63 isoforms in mouse embryos. (A) RT-PCR to examine the expression of *Trp63*, *TAp63* and *ΔNp63* in E8.5–E10.5 embryos; (B) *ΔNp63* expression in surface ectoderm cells covering the newly formed somites (So) and lateral plate mesenchyme (LPM) at E8.5, NEG represented negative control. Bar = 50  $\mu\text{m}$ .

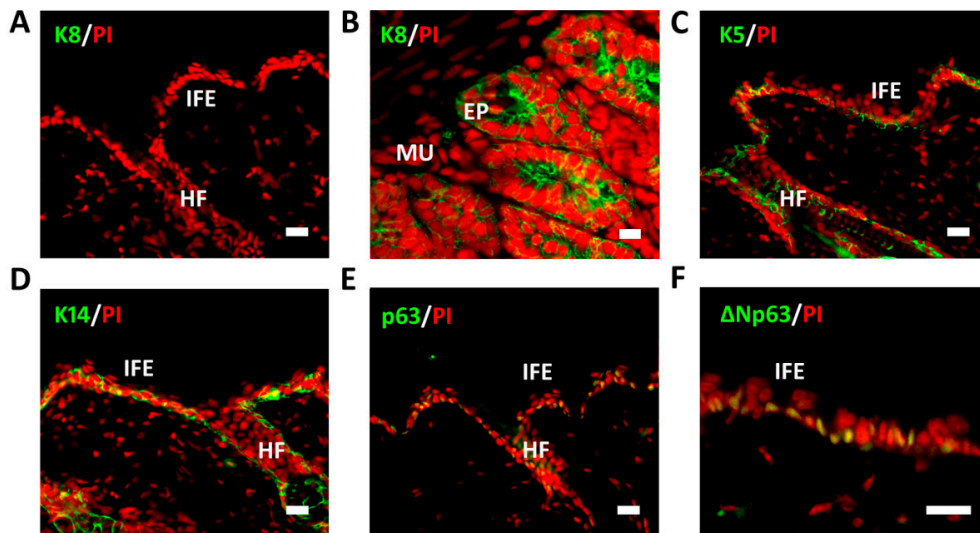

**Figure S5.** Verification of antibodies by immunofluorescence staining. (A) K8 (green) wasn't expressed in the mature mouse skin; (B) K8 (green) was specific expressed in the cytoplasm of mouse intestinal epithelial cells; (C,D) K5 (green) and K14 (green) were expressed in the cytoplasm of the basal layer cells in mature mouse skin; (E,F) p63 (green) and  $\Delta\text{Np63}$  (green) were expressed in the basal layer cell nuclei in mature mouse skin. PI was used to indicate the nuclei. HF, hair follicle; IFE, interfollicular epidermis; MU, mucosa; EP, epithelium. Bar = 20  $\mu\text{m}$ .
